# Supplementary material for: Quantifying International Travel Flows Using Flickr
Source: PubMed Central journal article supplement (PMC4493158; doi:10.1371/journal.pone.0128470), 2015-07-06

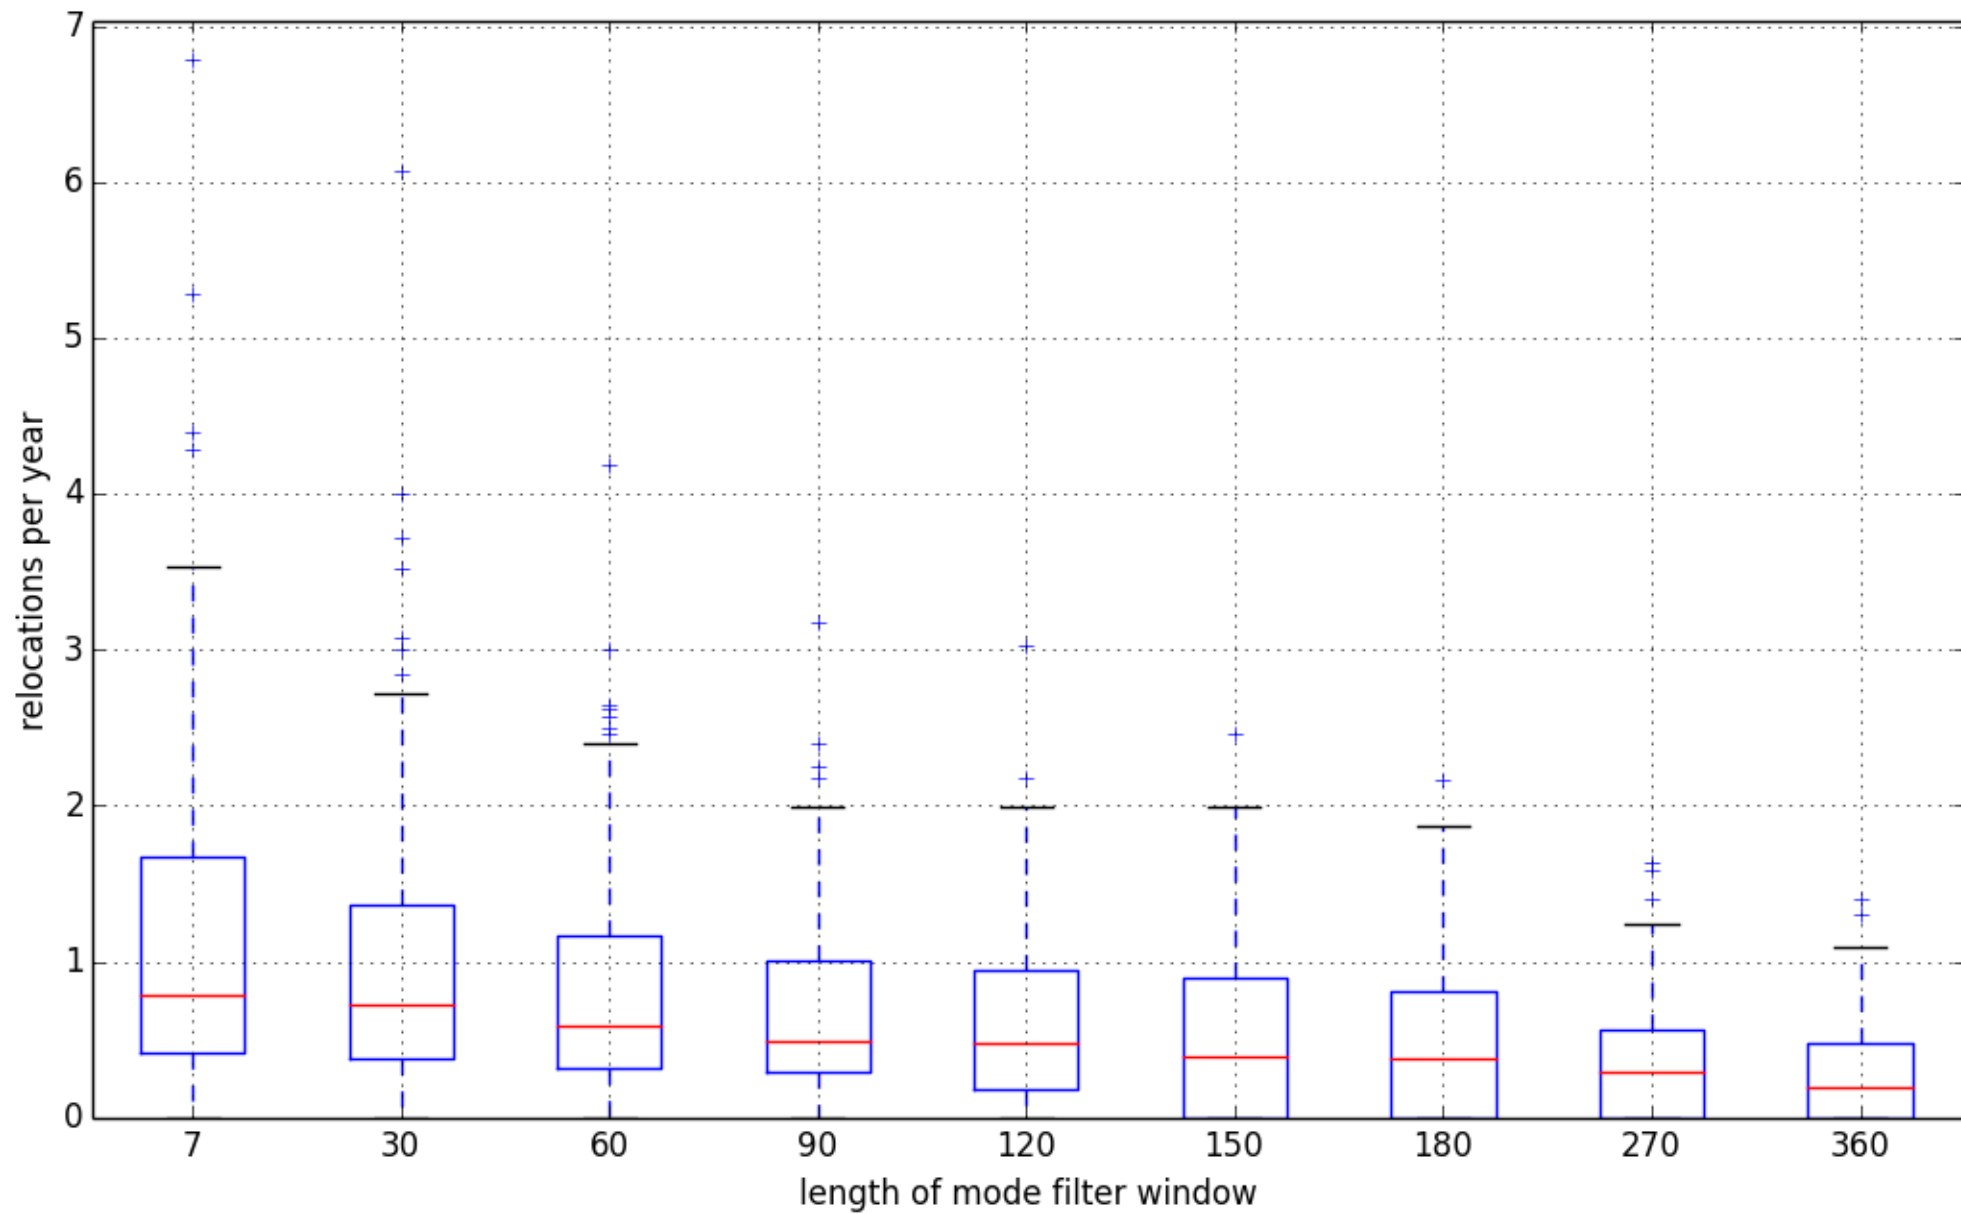

Supplement: pone.0128470.s003.pdf [file pone.0128470.s003.pdf]
